# Supplementary material for: Experimental and computational studies on the solvent-controlled cluster isomerism of Ru3(H)(CO)9(NPPh3) and related dynamics
Source: Royal Society of Chemistry journal article supplement (doi:10.1039/b516137a), 2006-01-01
Supplement: b516137a.pdf [file b516137a.pdf]

## Supporting Information

Full citation for reference number 9.

Gaussian 03, Revision B.05, M. J. Frisch, G. W. Trucks, H. B. Schlegel, G. E. Scuseria, M. A. Robb, J. R. Cheeseman, J. A. Montgomery, Jr., T. Vreven, K. N. Kudin, J. C. Burant, J. M. Millam, S. S. Iyengar, J. Tomasi, V. Barone, B. Mennucci, M. Cossi, G. Scalmani, N. Rega, G. A. Petersson, H. Nakatsuji, M. Hada, M. Ehara, K. Toyota, R. Fukuda, J. Hasegawa, M. Ishida, T. Nakajima, Y. Honda, O. Kitao, H. Nakai, M. Klene, X. Li, J. E. Knox, H. P. Hratchian, J. B. Cross, V. Bakken, C. Adamo, J. Jaramillo, R. Gomperts, R. E. Stratmann, O. Yazyev, A. J. Austin, R. Cammi, C. Pomelli, J. W. Ochterski, P. Y. Ayala, K. Morokuma, G. A. Voth, P. Salvador, J. J. Dannenberg, V. G. Zakrzewski, S. Dapprich, A. D. Daniels, M. C. Strain, O. Farkas, D. K. Malick, A. D. Rabuck, K. Raghavachari, J. B. Foresman, J. V. Ortiz, Q. Cui, A. G. Baboul, S. Clifford, J. Cioslowski, B. B. Stefanov, G. Liu, A. Liashenko, P. Piskorz, I. Komaromi, R. L. Martin, D. J. Fox, T. Keith, M. A. Al-Laham, C. Y. Peng, A. Nanayakkara, M. Challacombe, P. M. W. Gill, B. Johnson, W. Chen, M. W. Wong, C. Gonzalez, and J. A. Pople, Gaussian, Inc., Wallingford CT, 2004.

## Experimental

$\text{Ru}_3\text{CO}_{12}$ ,  $\text{Ph}_3\text{PNSiMe}_3$ ,  $\text{Et}_3\text{N}$ ,  $^t\text{BuOK}$  were purchased pure (Aldrich) and used without prior purification. The solvents were dried and distilled by standard techniques before use. The products were isolated by means of preparative TLC (20x20 silica plates, 1mm). The NMR spectra (chemical shifts in ppm) were recorded on Bruker instruments (Avance 300 for  $^1\text{H}$ , AMX400 for  $^{31}\text{P}$  and  $^{13}\text{C}$  at 300, 100.61 and 161.98 Mhz, respectively). The FTIR spectra were recorded on a Nicolet NEXUS spectrometer equipped with a Continuum FTIR microspectrometer. Elemental (C, H, N) analyses were performed on a Carlo Erba EA 1108 instrument.

### Synthesis of compounds **1a/1b**

A suspension of  $\text{Ph}_3\text{PNSiMe}_3$  (200 mg, 0.57 mmol) and  $\text{Ru}_3(\text{CO})_{12}$  (300 mg, 0.47 mmol) in  $\text{CH}_2\text{Cl}_2$  (1 mL) was placed under vacuum in a sealed tube and then heated to  $130^\circ\text{C}$ . The mixture turned to a brownish-red colour after 1 hour. The reaction was stopped after 3 h and compound **1a/1b** (yield 45%) was isolated by preparative TLC ( $\text{CH}_2\text{Cl}_2/\text{Hexane}$  1:2 mixture, RF: 0.6).

**1a:** FTIR (KBr disc,  $\nu_{\text{CO}}$ ,  $\text{cm}^{-1}$ ) 2064m, 2013vs, 1967vs, 1942sh, 1879w, 1814s. elemental analysis, calcd. (%) for  $\text{Ru}_3\text{PO}_9\text{NC}_{27}\text{H}_{16}$ : N 1.68, C 38.95, H 1.94; found: N 1.58, C 38.45, H 2.02.

**1b:**  $^1\text{H}$  NMR (300 MHz,  $\text{CDCl}_3$ ,  $25^\circ\text{C}$ , TMS):  $\delta = -15.2$  (d, 1H,  $^3J(^1\text{H}, ^{31}\text{P}) = 1.1$  Hz;  $\mu\text{-H}$ ), 7.7-7.3 (m, 15H; Ph);  $^1\text{H}\{^{31}\text{P}\}$  NMR (300 MHz,  $\text{CDCl}_3$ ,  $25^\circ\text{C}$ , TMS):  $\delta = -15.2$  (s, 1H;  $\mu\text{-H}$ ), 7.7-7.3 (m, 15H; Ph);  $^1\text{H}$  NMR (400 MHz,  $d_8\text{-toluene}$ , TMS):  $\delta = -14.75$  (s, 1H,  $^3J(^1\text{H}, ^{31}\text{P}) = 1.1$  Hz, unmodified in the range 293-213 K;  $\mu\text{-H}$ ), 7.8-7.3 (m, 15H; Ph);  $^{31}\text{P}\{^1\text{H}\}$  NMR (161.98 MHz,  $\text{CDCl}_3$ ,  $25^\circ\text{C}$ , ext. ref 85%  $\text{H}_3\text{PO}_4$ ):  $\delta = 52.0$  (s);  $^{31}\text{P}\{^1\text{H}\}$  NMR (161.98 MHz,  $d_8\text{-toluene}$ ,  $25^\circ\text{C}$ , ext. ref 85%  $\text{H}_3\text{PO}_4$ ):  $\delta = 50.7$  (s, unmodified in the range 293-213 K);  $^{13}\text{C}\{^1\text{H}\}$  NMR (100.61 MHz,  $\text{CDCl}_3$ ,  $25^\circ\text{C}$ , TMS):  $\delta = 195.0$  (s, CO, strong), 203 (s, CO, weak), 133 – 127 (m, Ph); FTIR (KBr disc,  $\nu_{\text{CO}}$ ,  $\text{cm}^{-1}$ ) 2071m, 2039s, 2011vs, 1992vs, 1967s, 1948s, 1948s, 1935s; FTIR ( $\text{CH}_2\text{Cl}_2$ ,  $\nu_{\text{CO}}$ ,  $\text{cm}^{-1}$ ) 2073w, 2047vs, 2017vs, 1990s, 1943w(sh); FTIR (Hexane,  $\nu_{\text{CO}}$ ,  $\text{cm}^{-1}$ ) 2075m, 2048vs, 2020vs, 2012m(sh), 1997s, 1989m(sh), 1982m, 1960w, 1953w, 1947w; elemental analysis, calcd. (%) for  $\text{Ru}_3\text{PO}_9\text{NC}_{37}\text{H}_{16}$ : N 1.68, C 38.95, H 1.94; found: N 1.74, C 38.99, H 1.87.

### Reaction of $\text{Ph}_3\text{PNSiMe}_3$ with $\text{Ru}_3(\text{CO})_{12}$ in $\text{CD}_2\text{Cl}_2$

The aforementioned reaction was repeated by using  $\text{CD}_2\text{Cl}_2$  instead of  $\text{CH}_2\text{Cl}_2$  in order to exclude the proton migrations from the solvent.

A suspension of  $\text{Ph}_3\text{PNSiMe}_3$  (100 mg, 0.28 mmol) and  $\text{Ru}_3(\text{CO})_{12}$  (150 mg, 0.23 mmol) in  $\text{CD}_2\text{Cl}_2$  (0.5 mL) was placed under vacuum in a sealed tube and then heated to  $140^\circ\text{C}$ . The colour turned to brownish-red after 1 hour. The reaction was stopped after 3 h and compound **1a/1b** (yield 36%) was isolated by preparative TLC ( $\text{CH}_2\text{Cl}_2/\text{Hexane}$  1:2 mixture, RF: 0.6).

### Reversible **1a-1b** conversion

Complex **1b** was dissolved in a CH<sub>2</sub>Cl<sub>2</sub>/Hexane mixture. After stirring for five minutes, evaporation of the solvent mixture gave compound **1a** in a quantitative yield. In a reversible manner, dissolution of **1a** in CH<sub>2</sub>Cl<sub>2</sub> followed by evaporation of the solvent gave compound **1b** in a quantitative yield.

### Synthesis of cation **2**

Starting with 83 mg of compound **1a/b** (0.1 mmol) dissolved in 30 mL of CH<sub>2</sub>Cl<sub>2</sub>, 11 mg of <sup>t</sup>BuOK (0.1 mmol) was then added to the yellow solution. The colour turned to pale yellow in 5 min. Filtration followed by evaporation of the solvents afforded **2·K** as a yellow powder. Alternatively, 83 mg of compound **1a/b** (0.1 mmol) was dissolved in 30 mL of CH<sub>2</sub>Cl<sub>2</sub>. 20 mg of Et<sub>3</sub>N (0.2 mmol) was then added to the yellow solution. The colour turned to pale yellow in 15 min. Removal of all volatiles afforded **2·HNEt<sub>3</sub>** as a yellow powder.

**2·K**: <sup>1</sup>H NMR (300 MHz, CDCl<sub>3</sub>, 25°C, TMS): 7.8-7.2 (m; Ph); <sup>31</sup>P{<sup>1</sup>H} NMR (161.98 MHz, CDCl<sub>3</sub>, 25°C, ext. ref 85% H<sub>3</sub>PO<sub>4</sub>): δ = 64.8 (s); FTIR (KBr disc, νCO, cm<sup>-1</sup>) 2011m, 1967vs, 1920vs, 1768s. FTIR (CH<sub>2</sub>Cl<sub>2</sub> solution, νCO, cm<sup>-1</sup>) 2015m, 1970vs, 1924vs, 1762m; elemental analysis calcd (%) for KRu<sub>3</sub>PO<sub>9</sub>NC<sub>27</sub>H<sub>15</sub>: N 1.61, C 37.24, H 1.74; found: N 1.60, C 38.04, H 1.65.

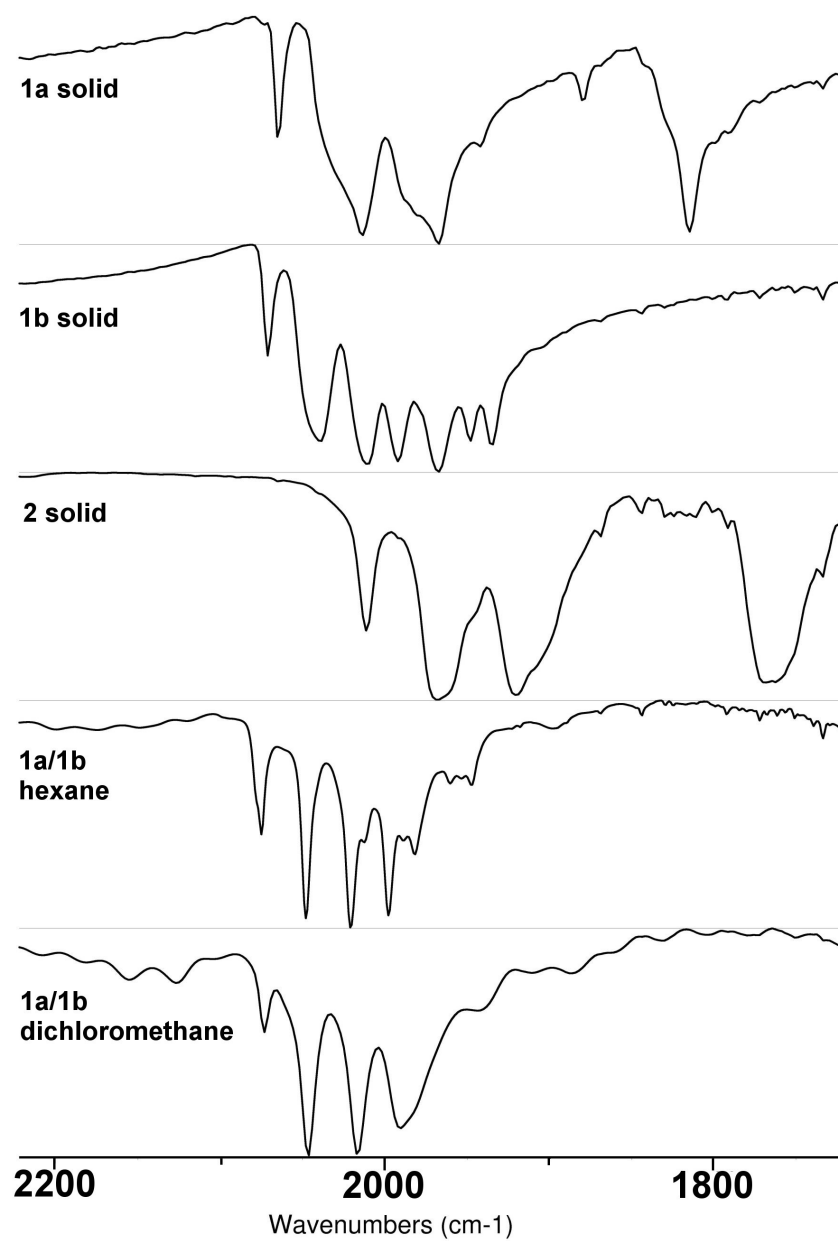

**Figure1:** Comparison between the FTIR spectra of compounds **1a/1b** (solid, CH<sub>2</sub>Cl<sub>2</sub> solution, saturated hexane solution) and **2**.

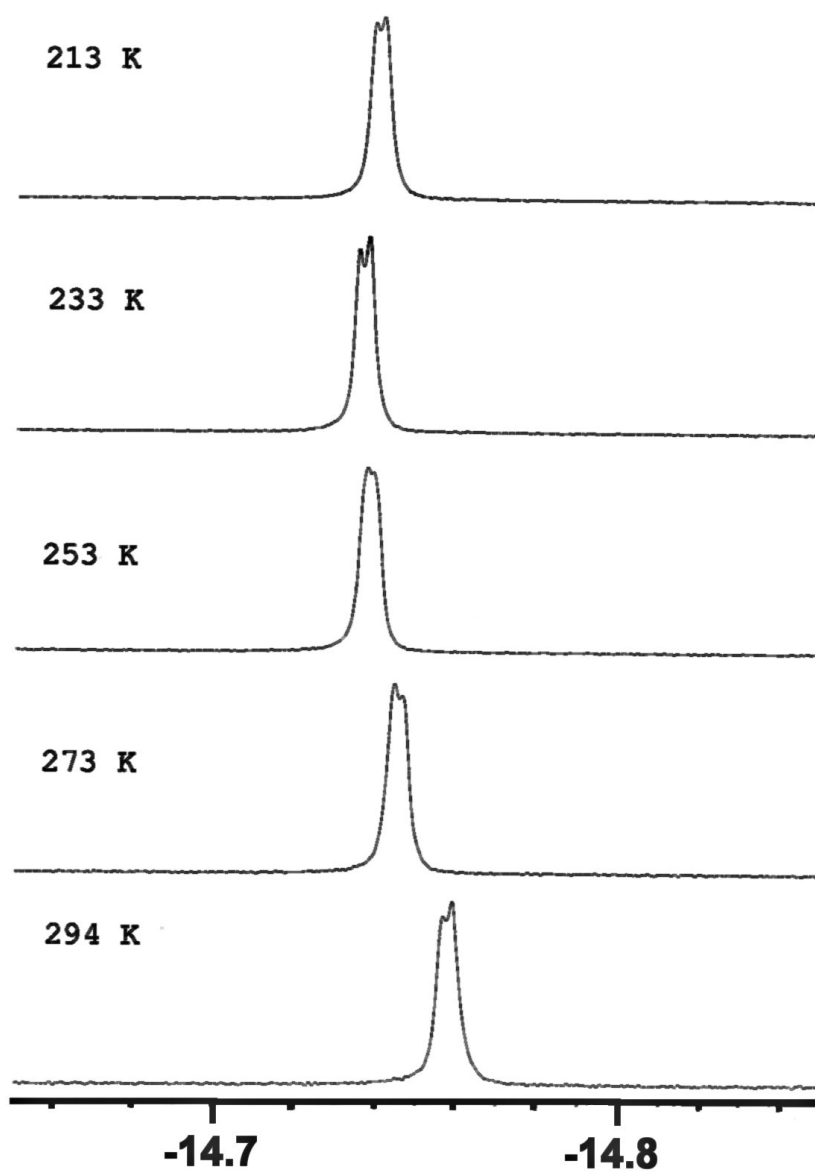

**Figure 2:**  $^1\text{H}$  NMR spectra of compound 1a/1b in  $\text{D}_8$ -toluene (ppm). No other signals detected in the typical hydride range (sw: 50 ppm centred at -10 ppm).

**X-ray data collection, structure solution and refinement for compounds 1a and 1b.**

Suitable crystals for the X-ray analysis of complexes **1b** and **1b** were obtained by evaporation of a dichloromethane/Hexane and a dichloromethane solution, respectively. The intensity data was collected at room temperature on a Bruker area detector AXS Smart 1000<sup>[1]</sup> (graphite monochromated MoK $\alpha$  radiation,  $\lambda = 0.71073$  Å). Crystallographic and experimental details for the structures are summarized in Table 1. Bruker SADABS software <sup>[2]</sup> [maximum and minimum transmission coefficient values: 1.000 and 0.709 (**1a**), 1.000 and 0.886 (**1b**)] was used for the absorption correction. The structures were solved by direct methods and refined by full-matrix least-squares procedures (based on  $F_o^2$ , SHELX-97)<sup>[3]</sup> first with isotropic thermal parameters and then with anisotropic thermal parameters in the last cycles of refinement for all the non-hydrogen. For isomer **1a** the hydrogen atoms were found in the  $F_o^2$  map and refined isotropically. For isomer **1b** the hydrogen atoms were introduced into the geometrically calculated positions and refined *riding* on the corresponding parent atoms, except that bound to ruthenium, found in the  $F_o^2$  map and refined isotropically. CCDC-289256 (**1a**), CCDC-289257 (**1b**), contain the supplementary crystallographic data for this paper that can be obtained free of charge from the Cambridge Crystallographic Data Centre via [www.ccdc.cam.ac.uk/data\\_request/cif](http://www.ccdc.cam.ac.uk/data_request/cif).

---

<sup>1</sup> *SAINT Software Users Guide; SMART Software Users Guide*; Bruker Analytical X-ray Systems: Madison, WI, **1999**;

<sup>2</sup> Sheldrick, G. M. *SADABS*; Bruker Analytical X-ray Systems, Madison, WI, **1999**.

<sup>3</sup> Sheldrick, M.; *SHELXL-97*, Program for crystal structure refinement; University of Göttingen: Germany, **1997**.

**Table 1:** X-ray data collection, structure solution and refinement parameters for compounds 1a and 1b.

| <b>Complexes</b>                               | <b>1a</b>                                                                                    | <b>1b</b>                                                                                    |
|------------------------------------------------|----------------------------------------------------------------------------------------------|----------------------------------------------------------------------------------------------|
| <b>Formula</b>                                 | C <sub>27</sub> H <sub>16</sub> N <sub>1</sub> O <sub>9</sub> P <sub>1</sub> Ru <sub>3</sub> | C <sub>27</sub> H <sub>16</sub> N <sub>1</sub> O <sub>9</sub> P <sub>1</sub> Ru <sub>3</sub> |
| <b>FW</b>                                      | 622.17                                                                                       | 1276.9                                                                                       |
| <i>Crystal System</i>                          | Monoclinic                                                                                   | Monoclinic                                                                                   |
| <i>Space Group</i>                             | <i>P21/n</i>                                                                                 | <i>P21/c</i>                                                                                 |
| <i>a</i> , Å                                   | 9.153(5)                                                                                     | 9.359(5)                                                                                     |
| <i>b</i> , Å                                   | 18.797(5)                                                                                    | 17.664(5)                                                                                    |
| <i>c</i> , Å                                   | 17.026(5)                                                                                    | 18.101(5)                                                                                    |
| $\alpha$ , °                                   | 90                                                                                           | 90                                                                                           |
| $\beta$ , °                                    | 90.88(3)                                                                                     | 100.10(3)                                                                                    |
| $\gamma$ , °                                   | 90                                                                                           | 90                                                                                           |
| <i>V</i> , Å <sup>3</sup>                      | 2929 (2)                                                                                     | 2946(5)                                                                                      |
| <i>Z</i>                                       | 4                                                                                            | 4                                                                                            |
| <i>D</i> <sub>calcd</sub> , g cm <sup>-3</sup> | 1.888                                                                                        | 1.877                                                                                        |
| <i>F</i> (000)                                 | 1616                                                                                         | 1616                                                                                         |
| <b>Crystal size (mm)</b>                       | 0.21 × 0.18 × 0.12                                                                           | 0.20 × 0.09 × 0.15                                                                           |
| $\mu$ , cm <sup>-1</sup>                       | 16.34                                                                                        | 16.24                                                                                        |
| <b>Rflns. collected</b>                        | 15690                                                                                        | 13668                                                                                        |
| <b>Rflns. unique</b>                           | 5731                                                                                         | 5036                                                                                         |
| <b>Rflns. observed</b>                         |                                                                                              |                                                                                              |
|                                                | 3562                                                                                         | 2072                                                                                         |
| <b>[<i>I</i> &gt; 2σ(<i>I</i>)]</b>            |                                                                                              |                                                                                              |
|                                                | 420                                                                                          | 285                                                                                          |
| <b>Parameters</b>                              |                                                                                              |                                                                                              |
| <b><i>R</i> Indices</b>                        | <i>RI</i> = 0.0306,                                                                          | <i>RI</i> = 0.0411,                                                                          |
| <b>[<i>I</i> &gt; 2σ(<i>I</i>)]</b>            | <i>wR2</i> = 0.0390                                                                          | <i>wR2</i> = 0.1222                                                                          |
| <b><i>R</i> Indices</b>                        | <i>R2</i> = 0.0703,                                                                          | <i>R2</i> = 0.0442,                                                                          |
| <b>(all data)</b>                              | <i>wR2</i> = 0.0432                                                                          | <i>wR2</i> = 0.0535                                                                          |

## Labelling Scheme For **1a**

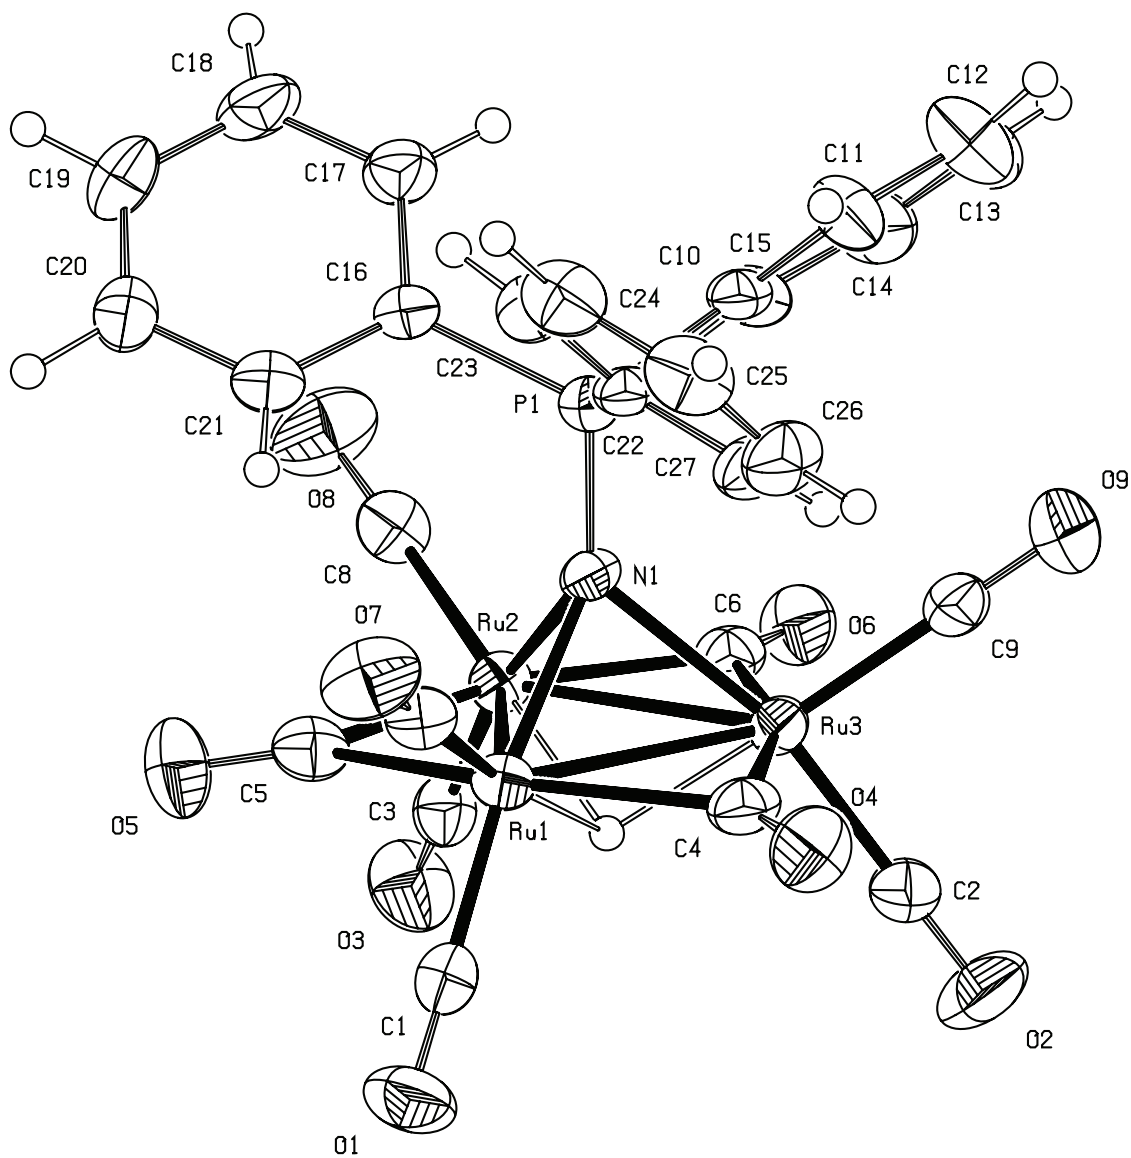



## Labelling Scheme For **1b**

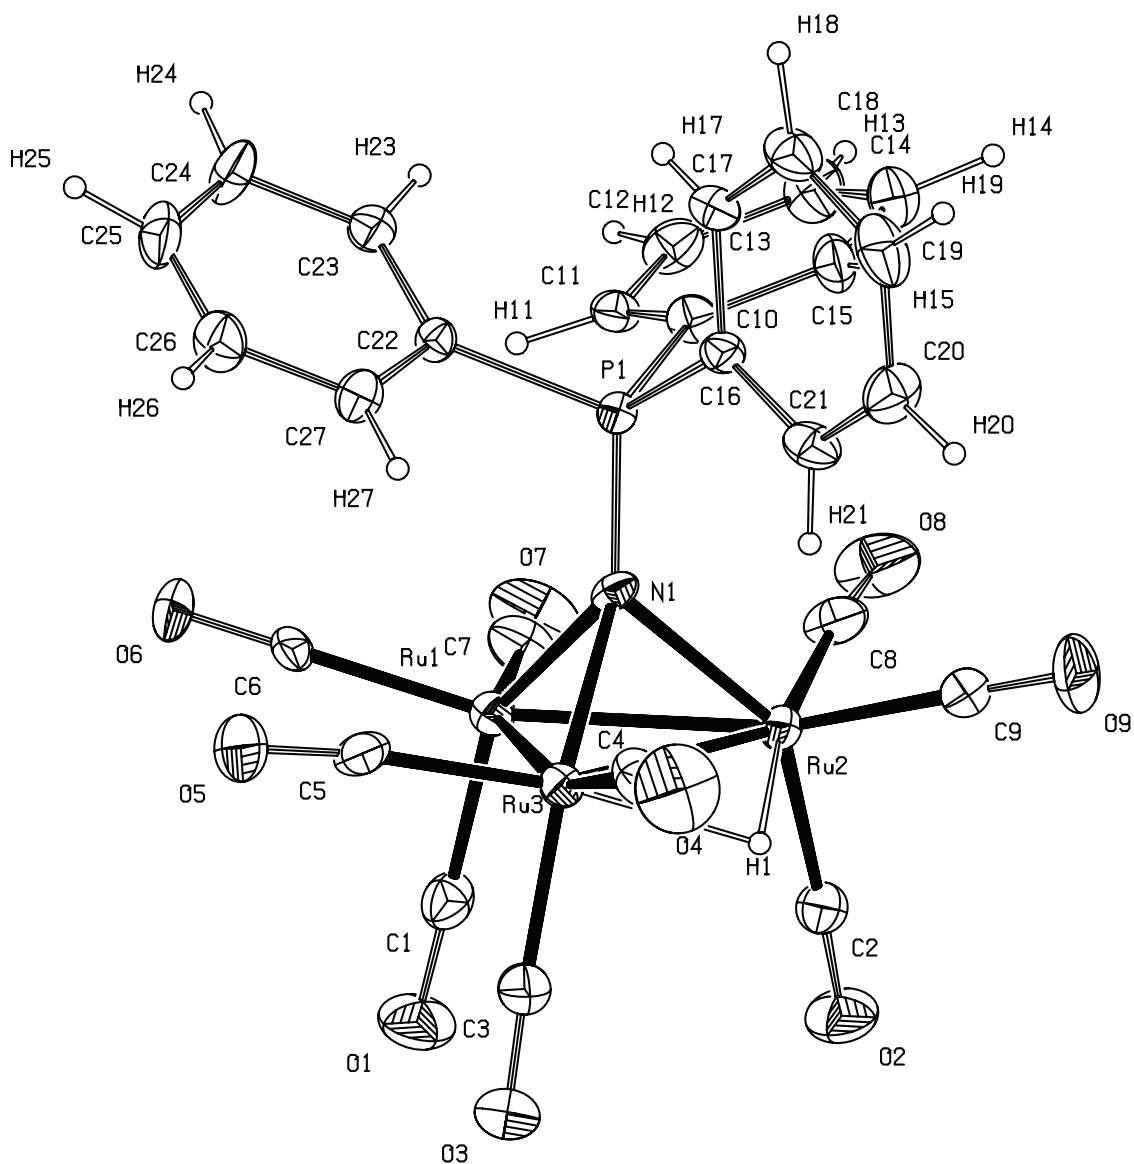

**Table 2:** Selected bond distances and angles for compounds **1a** and **1b**.

| Distances (Å) | <b>1a</b>        | <b>1a</b> Computed | <b>1b</b>        | <b>1b</b> Computed |
|---------------|------------------|--------------------|------------------|--------------------|
|               | Crystallographic | ( $C_{3v}$ )       | Crystallographic | ( $C_s$ )          |
| Ru1-Ru2       | 2.8421(9)        | 2.799              | 2.6667(9)        | 2.716              |
| Ru1-Ru3       | 2.8291(9)        | 2.799              | 2.6588(9)        | 2.716              |
| Ru2-Ru3       | 2.7920(14)       | 2.799              | 2.8179(8)        | 2.868              |
| N1-Ru1        | 2.196(3)         | 2.160              | 2.097(5)         | 2.113              |
| N1-Ru2        | 2.184(3)         | 2.160              | 2.113(5)         | 2.119              |
| N1-Ru3        | 2.163(3)         | 2.160              | 2.119(5)         | 2.119              |
| H1-Ru1        | 1.82(3)          | 1.931              | -                | -                  |
| H1-Ru2        | 1.84(3)          | 1.931              | 1.85(6)          | 1.798              |
| H1-Ru3        | 1.99(3)          | 1.931              | 1.92(6)          | 1.798              |
| P1-N1         | 1.606(3)         | 1.586              | 1.631(5)         | 1.600              |
| Ru1-C3        | 2.212(4)         | 2.156              | -                | -                  |
| Ru1-C4        | 2.157(4)         | 2.156              | -                | -                  |
| Ru2-C4        | 2.255(5)         | 2.156              | -                | -                  |
| Ru2-C7        | 2.153(4)         | 2.156              | -                | -                  |
| Ru3-C3        | 2.201(5)         | 2.156              | -                | -                  |
| Ru3-C7        | 2.261(5)         | 2.156              | -                | -                  |

| Angles (°)  | <b>1a</b>        | <b>1a</b> Computed | <b>1b</b>        | <b>1b</b> Computed |
|-------------|------------------|--------------------|------------------|--------------------|
|             | Crystallographic | ( $C_{3v}$ )       | Crystallographic | ( $C_s$ )          |
| Ru2-Ru1-Ru3 | 58.98(3)         | 60.00              | 63.89(2)         | 63.75              |
| Ru1-Ru2-Ru3 | 60.276(13)       | 60.00              | 58.19(2)         | 58.12              |
| Ru1-Ru3-Ru2 | 60.74(2)         | 60.00              | 58.19(2)         | 58.12              |
| Ru1-N1-Ru2  | 80.92(10)        | 80.80              | 78.59(17)        | 79.84              |
| Ru1-N1-Ru3  | 80.94(10)        | 80.80              | 78.19(18)        | 79.84              |
| Ru2-N1-Ru3  | 79.93(10)        | 80.80              | 83.5(2)          | 85.17              |
| Ru1-H1-Ru2  | 101.7(7)         | 92.93              | -                | -                  |
| Ru1-H1-Ru3  | 95.9(6)          | 92.93              | 96.8(7)          | 105.78             |
| Ru2-H1-Ru3  | 93.4(7)          | 92.93              | -                | -                  |
| P1-N1-Ru1   | 130.55(18)       | 131.55             | 128.5(3)         | 129.95             |
| P1-N1-Ru2   | 132.33(17)       | 131.55             | 128.5(3)         | 129.95             |
| P1-N1-Ru3   | 132.17(16)       | 131.55             | 138.2(3)         | 133.16             |
| Ru1-C4-Ru2  | 80.17(15)        | 80.95              | -                | -                  |
| Ru1-C3-Ru3  | 79.75(15)        | 80.95              | -                | -                  |
| Ru2-C7-Ru3  | 78.43(16)        | 80.95              | -                | -                  |
| N1-Ru1-H1   | 72.5(9)          | 74.71              | -                | -                  |
| N1-Ru2-H1   | 72.4(8)          | 74.71              | 86.0(19)         | 83.33              |
| N1-Ru3-H1   | 70.3(8)          | 74.71              | 84.1(19)         | 83.33              |

**Table 3:** Cartesian coordinates for the species **1a<sub>m</sub>**, **1b<sub>m</sub>**, **1c<sub>m</sub>**, **2a<sub>m</sub>** and **2b<sub>m</sub>**

| Model <b>1a<sub>m</sub></b> |             |             |             |    |             |             |             |
|-----------------------------|-------------|-------------|-------------|----|-------------|-------------|-------------|
| O                           | -4.08922400 | 1.63012900  | 0.00000000  | P  | 0.01372700  | 2.88674300  | 0.00000000  |
| O                           | -1.80807800 | -0.18878300 | 3.12974100  | N  | -0.00001800 | 1.30041100  | 0.00000000  |
| O                           | -3.35588700 | -2.61988500 | 0.00000000  | O  | 2.03729900  | 1.61943000  | 3.55054800  |
| C                           | -3.15939300 | 0.94804800  | 0.00000000  | Ru | 0.80791400  | -0.13224500 | -1.39962000 |
| C                           | -2.70586200 | -1.67075900 | 0.00000000  | C  | 2.44749600  | -0.14747900 | 0.00000000  |
| C                           | -1.22587300 | -0.15324300 | 2.11926700  | C  | 1.35317000  | -1.67608800 | -2.33708700 |
| Ru                          | -1.61772600 | -0.12951000 | 0.00000000  | C  | 1.57511300  | 0.94066500  | -2.74086000 |
| O                           | 1.67994300  | -2.62661700 | 2.89669000  | O  | 1.67994300  | -2.62661700 | -2.89669000 |
| C                           | 1.35317000  | -1.67608800 | 2.33708700  | O  | 3.61401700  | -0.17479500 | 0.00000000  |
| O                           | -1.80807800 | -0.18878300 | -3.12974100 | O  | 2.03729900  | 1.61943000  | -3.55054800 |
| H                           | -0.00079000 | -1.18681500 | 0.00000000  | H  | -0.61952500 | 3.49147400  | -1.10678600 |
| C                           | -1.22587300 | -0.15324300 | -2.11926700 | H  | -0.61952500 | 3.49147400  | 1.10678600  |
| Ru                          | 0.80791400  | -0.13224500 | 1.39962000  | H  | 1.29736500  | 3.47291600  | 0.00000000  |
| C                           | 1.57511300  | 0.94066500  | 2.74086000  |    |             |             |             |
| Model <b>1b<sub>m</sub></b> |             |             |             |    |             |             |             |
| O                           | 3.42005100  | -0.86571400 | 2.23237800  | C  | -0.69973500 | 1.91256700  | 2.12791100  |
| O                           | 3.42005100  | -0.86571400 | -2.23237800 | O  | -0.63957400 | 2.99179700  | 2.52055700  |
| C                           | 2.66164700  | -0.56732000 | 1.41578000  | Ru | -0.81065200 | 0.14389900  | -1.43408100 |
| C                           | 2.66164700  | -0.56732000 | -1.41578000 | O  | -0.63957400 | 2.99179700  | -2.52055700 |
| O                           | 2.34735500  | 2.89247900  | 0.00000000  | C  | -0.69973500 | 1.91256700  | -2.12791100 |
| C                           | 2.03021900  | 1.78427200  | 0.00000000  | H  | -1.51297700 | 0.97098200  | 0.00000000  |
| Ru                          | 1.48867000  | -0.03222100 | 0.00000000  | C  | -2.64530000 | -0.25644100 | 1.93400100  |
| O                           | 0.49687700  | -1.01335000 | 3.94372100  | C  | -2.64530000 | -0.25644100 | -1.93400100 |
| C                           | 0.02670500  | -0.57649400 | 2.98753000  | O  | -3.72462900 | -0.45447300 | 2.27965800  |
| O                           | 0.49687700  | -1.01335000 | -3.94372100 | O  | -3.72462900 | -0.45447300 | -2.27965800 |
| P                           | -0.38585400 | -2.88405500 | 0.00000000  | H  | -1.72305100 | -3.33670700 | 0.00000000  |
| C                           | 0.02670500  | -0.57649400 | -2.98753000 | H  | 0.18714500  | -3.54210500 | 1.10788100  |
| N                           | -0.20543900 | -1.29428000 | 0.00000000  | H  | 0.18714500  | -3.54210500 | -1.10788100 |
| Ru                          | -0.81065200 | 0.14389900  | 1.43408100  |    |             |             |             |
| Model <b>1c<sub>m</sub></b> |             |             |             |    |             |             |             |
| O                           | 2.33228100  | 3.34052600  | 0.85600100  | O  | 2.46554300  | -1.42348200 | -2.90505100 |
| O                           | -2.33228100 | 3.34052600  | 0.85600100  | Ru | -1.38528200 | -0.79979300 | -0.12512000 |
| C                           | 1.48441200  | 2.65714400  | 0.47819600  | O  | -2.46554300 | -1.42348200 | -2.90505100 |
| C                           | -1.48441200 | 2.65714400  | 0.47819600  | C  | -2.07929700 | -1.20048300 | -1.84466700 |
| O                           | 0.00000000  | 2.84696400  | -2.90505100 | C  | 1.55894800  | -2.61411000 | 0.47819600  |
| C                           | 0.00000000  | 2.40096500  | -1.84466700 | C  | -1.55894800 | -2.61411000 | 0.47819600  |
| Ru                          | 0.00000000  | 1.59958600  | -0.12512000 | O  | 1.72684000  | -3.69007800 | 0.85600100  |
| O                           | 4.05912100  | 0.34955200  | 0.85600100  | O  | -1.72684000 | -3.69007800 | 0.85600100  |
| C                           | 3.04336000  | -0.04303300 | 0.47819600  | H  | 0.00000000  | -1.28041400 | 3.45745500  |
| O                           | -4.05912100 | 0.34955200  | 0.85600100  | H  | 1.10887100  | 0.64020700  | 3.45745500  |
| P                           | 0.00000000  | 0.00000000  | 2.86815500  | H  | -1.10887100 | 0.64020700  | 3.45745500  |
| C                           | -3.04336000 | -0.04303300 | 0.47819600  | N  | 0.00000000  | 0.00000000  | 1.27169200  |
| Ru                          | 1.38528200  | -0.79979300 | -0.12512000 | H  | 0.00000000  | 0.00000000  | -1.15857900 |
| C                           | 2.07929700  | -1.20048300 | -1.84466700 |    |             |             |             |

# Supplementary Material (ESI) for Chemical Communications  
# This journal is © The Royal Society of Chemistry 2006

**Model 2a<sub>m</sub>**

|    |             |             |              |    |             |             |             |
|----|-------------|-------------|--------------|----|-------------|-------------|-------------|
| O  | 0.00000000  | 4.15659400  | 1.58890000   | P  | 0.00000000  | 0.00000000  | 2.91781500  |
| O  | -3.09112900 | 1.78466400  | 0-0.39810600 | N  | 0.00000000  | 0.00000000  | 1.34445500  |
| O  | 0.00000000  | 3.15684200  | 0-2.68632000 | O  | -3.59971600 | -2.07829700 | 1.58890000  |
| C  | 0.00000000  | 3.18905800  | 0.94222200   | Ru | 1.39786900  | -0.80706000 | -0.07895000 |
| C  | 0.00000000  | 2.56854100  | -1.68755700  | C  | 0.00000000  | -2.40552700 | -0.22552400 |
| C  | -2.08324800 | 1.20276400  | -0.22552400  | C  | 2.22442200  | -1.28427000 | -1.68755700 |
| Ru | 0.00000000  | 1.61412000  | -0.07895000  | C  | 2.76180500  | -1.59452900 | 0.94222200  |
| O  | -2.73390500 | -1.57842100 | -2.68632000  | O  | 2.73390500  | -1.57842100 | -2.68632000 |
| C  | -2.22442200 | -1.28427000 | -1.68755700  | O  | 0.00000000  | -3.56932900 | -0.39810600 |
| O  | 3.09112900  | 1.78466400  | -0.39810600  | O  | 3.59971600  | -2.07829700 | 1.58890000  |
| C  | 2.08324800  | 1.20276400  | -0.22552400  | H  | 1.10250400  | 0.63653100  | 3.53703600  |
| Ru | -1.39786900 | -0.80706000 | -0.07895000  | H  | -1.10250400 | 0.63653100  | 3.53703600  |
| C  | -2.76180500 | -1.59452900 | 0.94222200   | H  | 0.00000000  | -1.27306200 | 3.53703600  |

**Model 2b<sub>m</sub>**

|    |             |             |             |    |             |             |             |
|----|-------------|-------------|-------------|----|-------------|-------------|-------------|
| O  | 3.45716900  | -0.63444800 | 2.32625900  | Ru | -0.78929700 | 0.02591300  | 1.36448900  |
| O  | 3.45716900  | -0.63444800 | -2.32625900 | C  | -0.98333700 | 1.87723000  | 1.67313500  |
| C  | 2.70785400  | -0.39856100 | 1.47030100  | O  | -1.11647100 | 3.00906200  | 1.88790900  |
| C  | 2.70785400  | -0.39856100 | -1.47030100 | Ru | -0.78929700 | 0.02591300  | -1.36448900 |
| O  | 2.18094100  | 3.02680000  | 0.00000000  | O  | -1.11647100 | 3.00906200  | -1.88790900 |
| C  | 1.93291800  | 1.89396500  | 0.00000000  | C  | -0.98333700 | 1.87723000  | -1.67313500 |
| Ru | 1.57527600  | 0.04029000  | 0.00000000  | C  | -2.62613200 | -0.42476900 | 1.61019600  |
| O  | 0.28010900  | -0.62387400 | 4.16487700  | C  | -2.62613200 | -0.42476900 | -1.61019600 |
| C  | -0.08386700 | -0.40095600 | 3.08435600  | O  | -3.74148500 | -0.66266900 | 1.83146500  |
| O  | 0.28010900  | -0.62387400 | -4.16487700 | O  | -3.74148500 | -0.66266900 | -1.83146500 |
| P  | 0.04171300  | -2.96479600 | 0.00000000  | H  | -1.22062000 | -3.60535000 | 0.00000000  |
| C  | -0.08386700 | -0.40095600 | -3.08435600 | H  | 0.69184200  | -3.56513200 | 1.10460800  |
| N  | 0.00983200  | -1.38117700 | 0.00000000  | H  | 0.69184200  | -3.56513200 | -1.10460800 |
